# Supplementary material for: Just-in-Time Feedback in Diet and Physical Activity Interventions: Systematic Review and Practical Design Framework
Source: PubMed Central journal article supplement (PMC5887039; doi:10.2196/jmir.8701), 2018-03-22
Supplement: jmir_v20i3e106_app1.pdf [file jmir_v20i3e106_app1.pdf]

---

**Supplement 1. Data extraction form**

---

**Study Characteristics**

|                          |      |                   |      |
|--------------------------|------|-------------------|------|
| <i>Intervention type</i> | Diet | Physical activity | Both |
| <i>Pilot study</i>       | Yes  | No                |      |
| <i>Country of study</i>  |      |                   |      |

**Participant Characteristics**

|                                    |                    |                                     |                                   |
|------------------------------------|--------------------|-------------------------------------|-----------------------------------|
| <i>Study population</i>            | General population | Patient population (please specify) | Other population (please specify) |
| <i>Age range</i>                   |                    |                                     |                                   |
| <i>Mean age</i>                    |                    |                                     |                                   |
| <i>Percent female</i>              |                    |                                     |                                   |
| <i>Percent overweight/obese</i>    |                    |                                     |                                   |
| <i># of participants enrolled</i>  |                    |                                     |                                   |
| <i># of participants completed</i> |                    |                                     |                                   |

**Intervention Characteristics**

|                                      |                                |                                       |                        |
|--------------------------------------|--------------------------------|---------------------------------------|------------------------|
| <i>Study design</i>                  | Randomized control trial       | Cohort study                          | Other (please specify) |
| <i>Behavioral theory used</i>        |                                |                                       |                        |
| <i>Intervention duration</i>         |                                |                                       |                        |
| <i>Targeted behavior(s)</i>          |                                |                                       |                        |
| <i>Behavioral assessment methods</i> | Self-reported (please specify) | Objectively measured (please specify) |                        |
| <i>Behavioral goal(s)</i>            |                                |                                       |                        |

**Feedback Characteristics**

|                                     |                                |                 |                                 |         |                        |
|-------------------------------------|--------------------------------|-----------------|---------------------------------|---------|------------------------|
| <i>Content (control group)</i>      |                                |                 |                                 |         |                        |
| <i>Content (intervention group)</i> |                                |                 |                                 |         |                        |
| <i>Actionable</i>                   | Yes                            | No              |                                 |         |                        |
| <i>Frequency</i>                    |                                |                 |                                 |         |                        |
| <i>Timing</i>                       |                                |                 |                                 |         |                        |
| <i>Mode of delivery</i>             | Mobile phone/SMS text messages | Smartphone apps | Wearable devices (e.g., Fitbit) | Website | Other (please specify) |
| <i>Prompt</i>                       | Passive                        | User-initiated  |                                 |         |                        |

**Study Results**

|                                                                  |            |                          |                             |
|------------------------------------------------------------------|------------|--------------------------|-----------------------------|
| <i>Within-group changes (separate row for each outcome)</i>      | Outcome(s) | Magnitude of change:     | Significance of change:     |
| <i>Between-group differences (separate row for each outcome)</i> | Outcome(s) | Magnitude of difference: | Significance of difference: |

---
